# Supplementary material
Source: ML conference proceedings conference paper supplement (https://openreview.net/forum?id=ULe3XJBf7FN)

—  $\text{CVaR}_\alpha(G|\pi^*, \varphi)$  —  $\mathbb{E}_{\pi^*, \varphi}[G]$

Normal:  $\mathcal{P}^{\pi^*}_{\varphi_{\text{Normal}}, \alpha}$

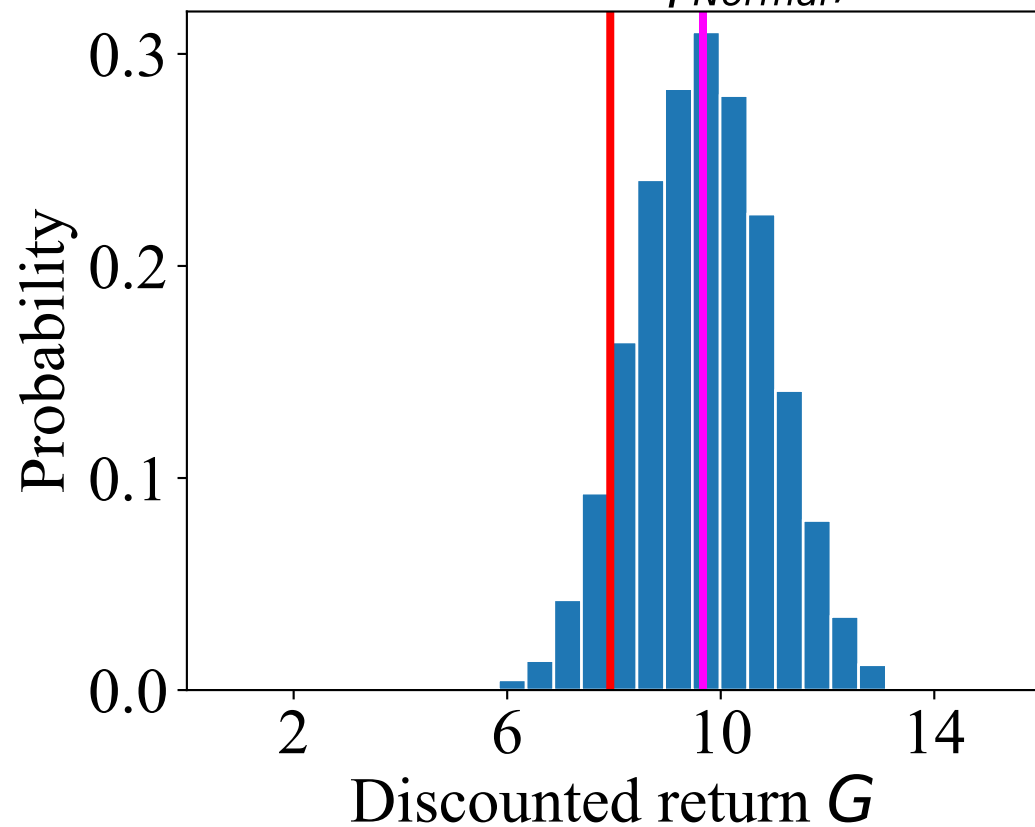

Cauchy:  $\mathcal{P}^{\pi^*}_{\varphi_{\text{Cauchy}}, \alpha}$

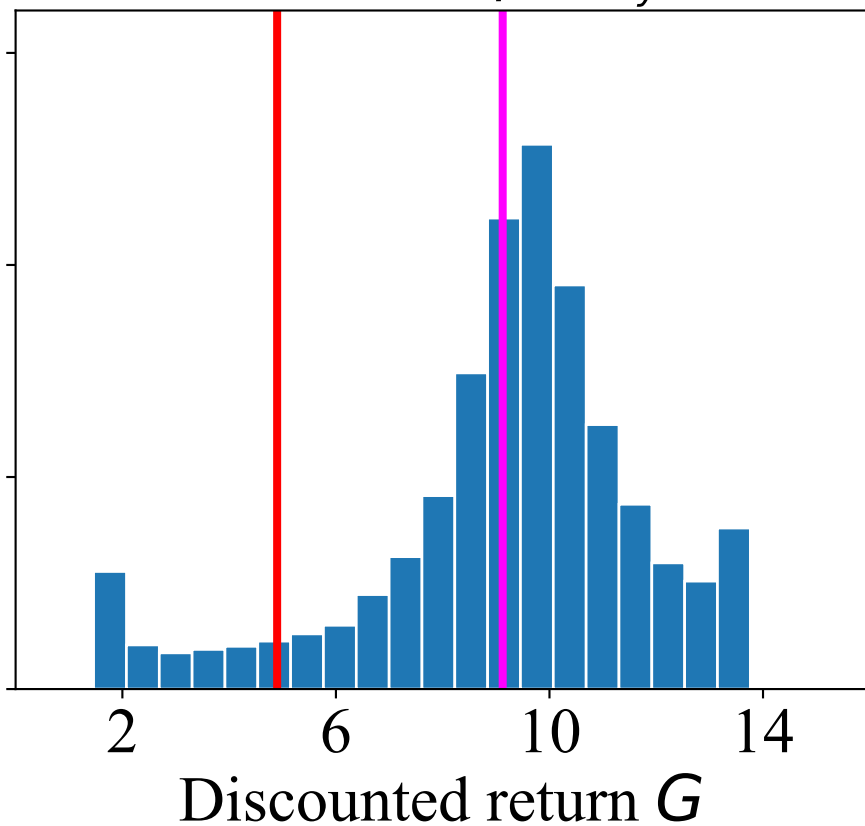

Supplement: supplementary_material [file attachment]
