# Supplementary material
Source: ML conference proceedings conference paper supplement (https://openreview.net/forum?id=ULe3XJBf7FN)

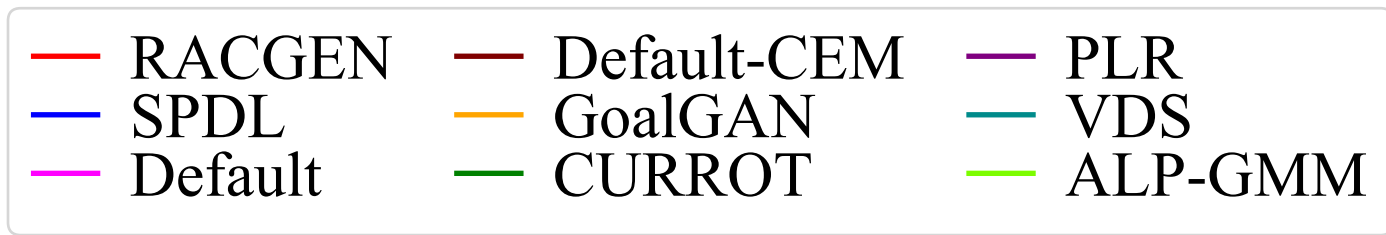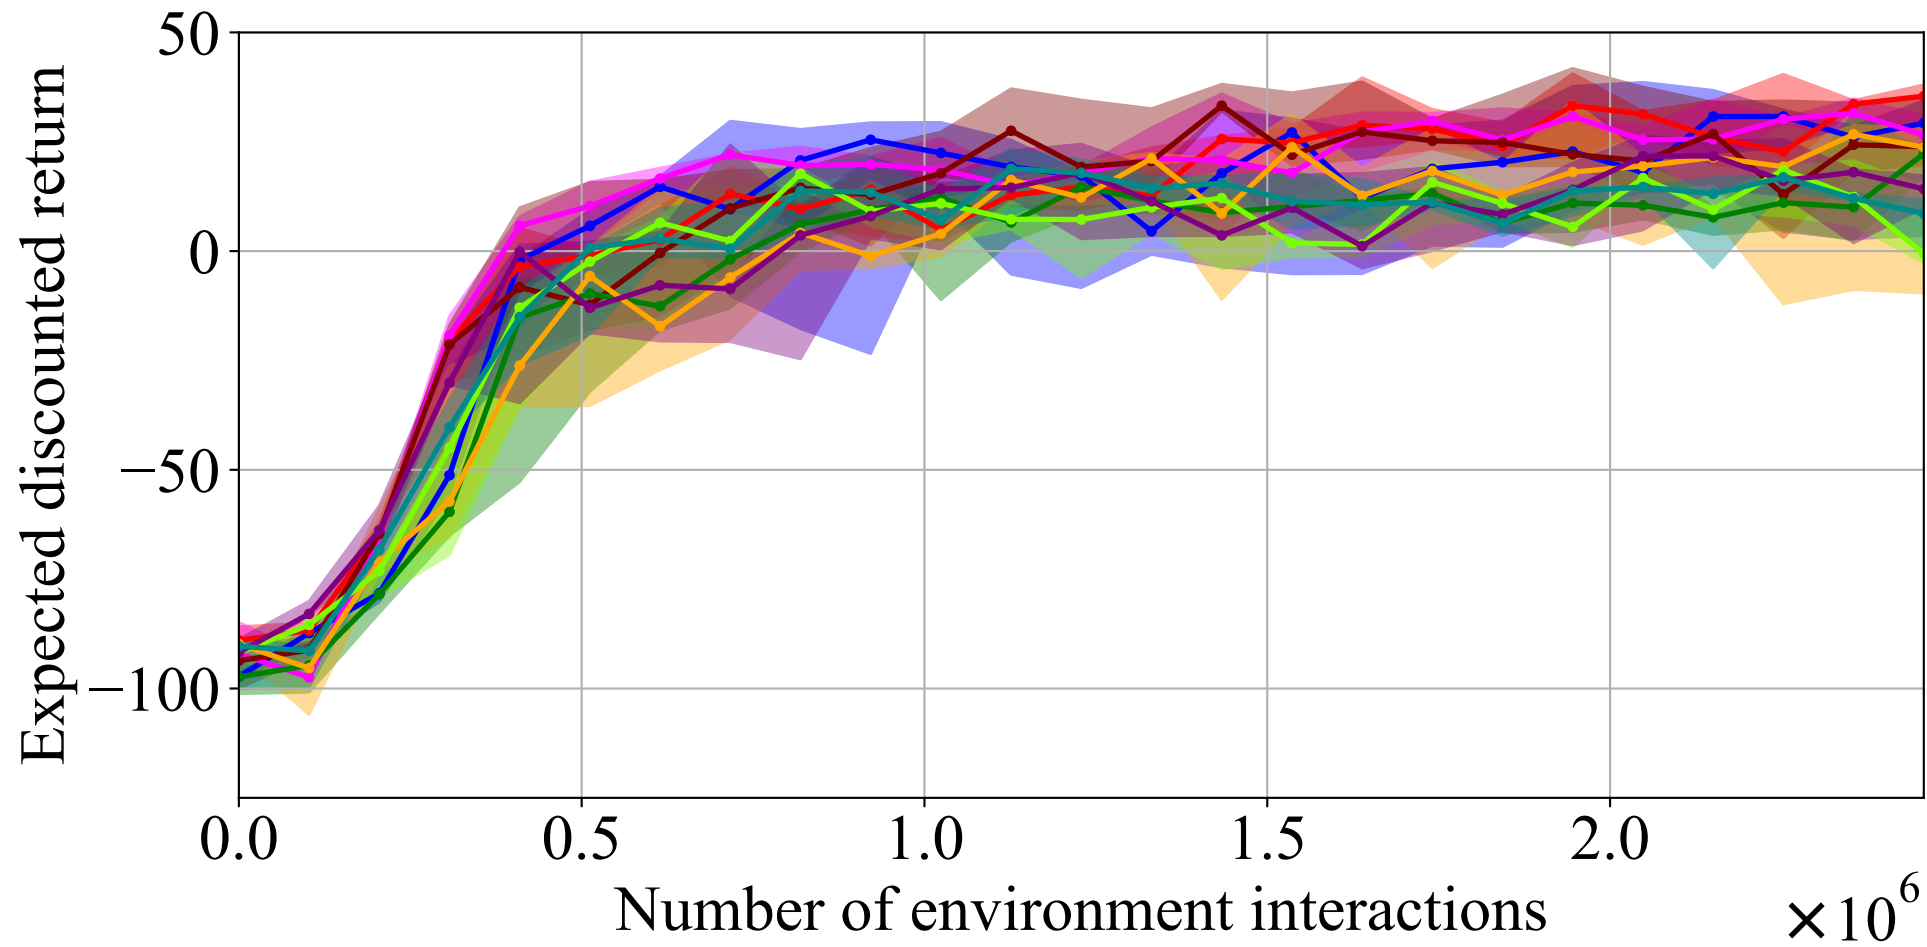

Supplement: supplementary_material [file attachment]

— Pdf   ■ Non-risky   ■ Risky

Normal:  $\varphi_{Normal}(\mathbf{c})$

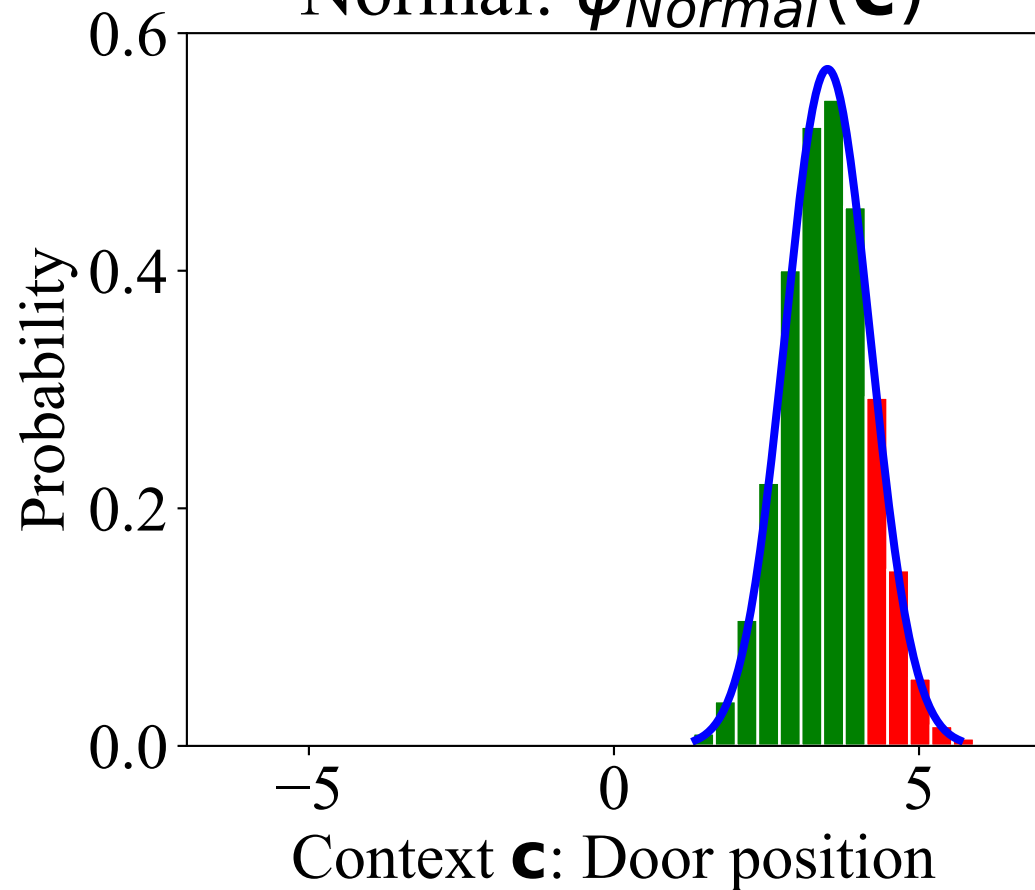

Cauchy:  $\varphi_{Cauchy}(\mathbf{c})$

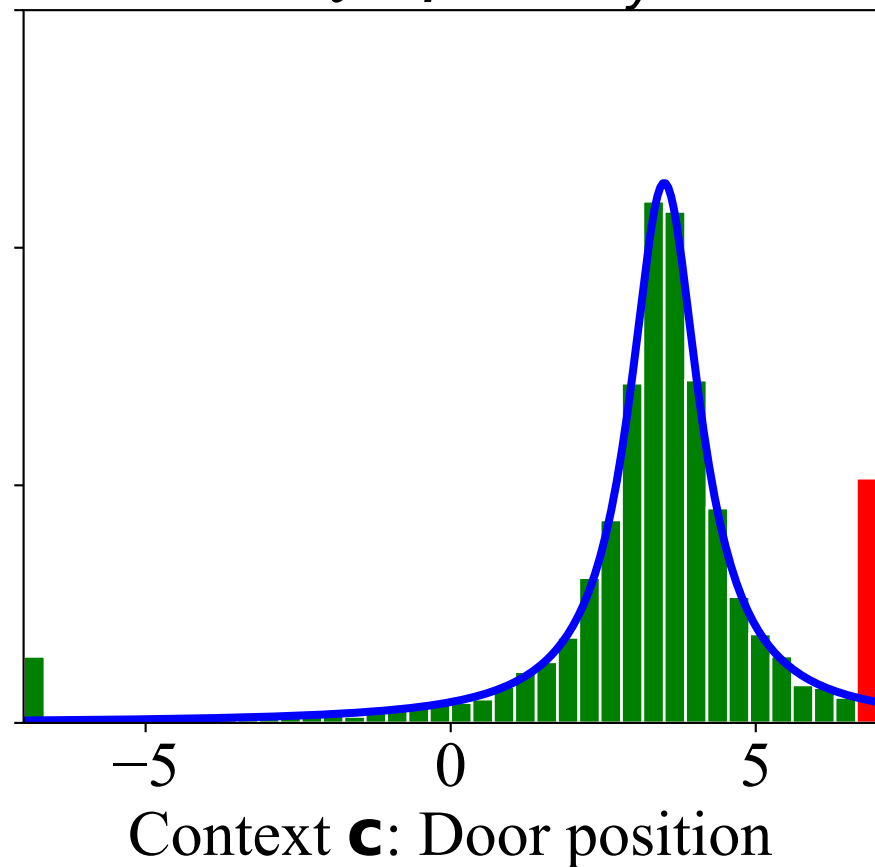

Supplement: supplementary_material [file attachment]

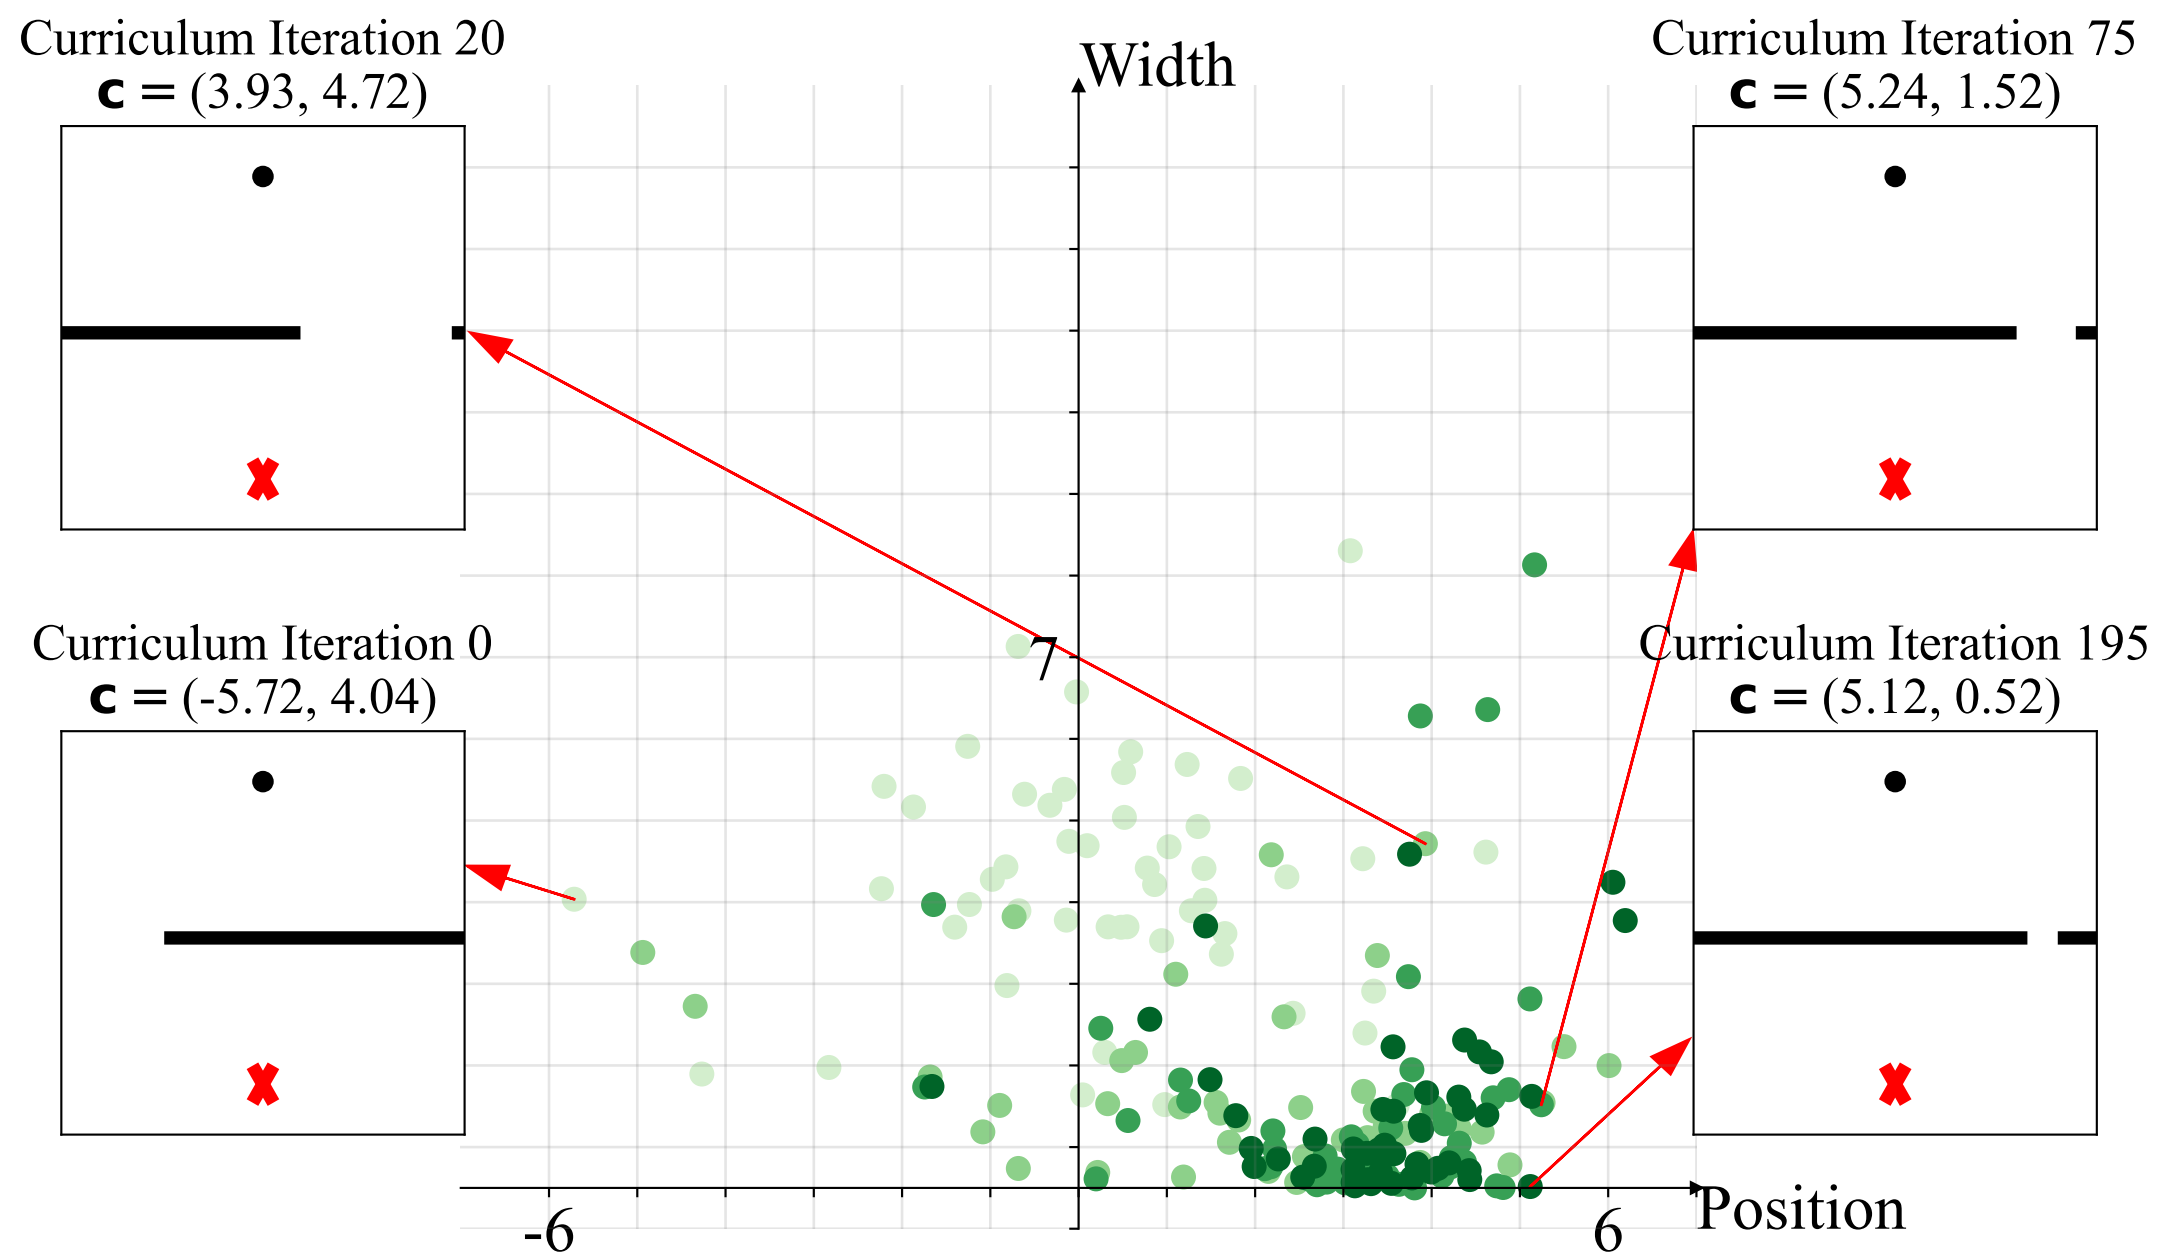

Supplement: supplementary_material [file attachment]

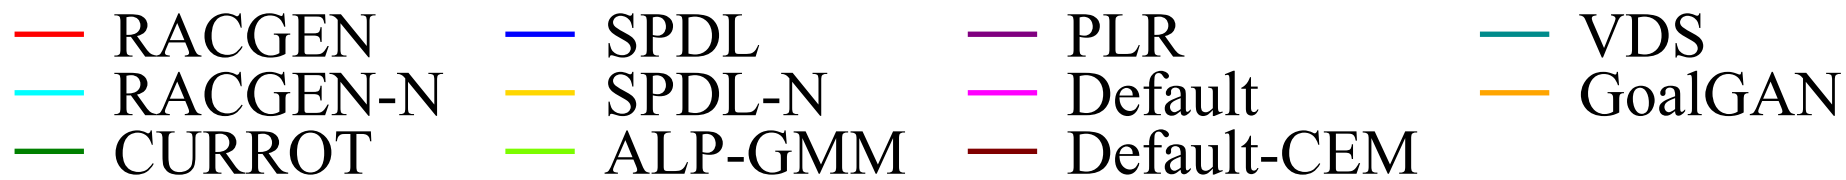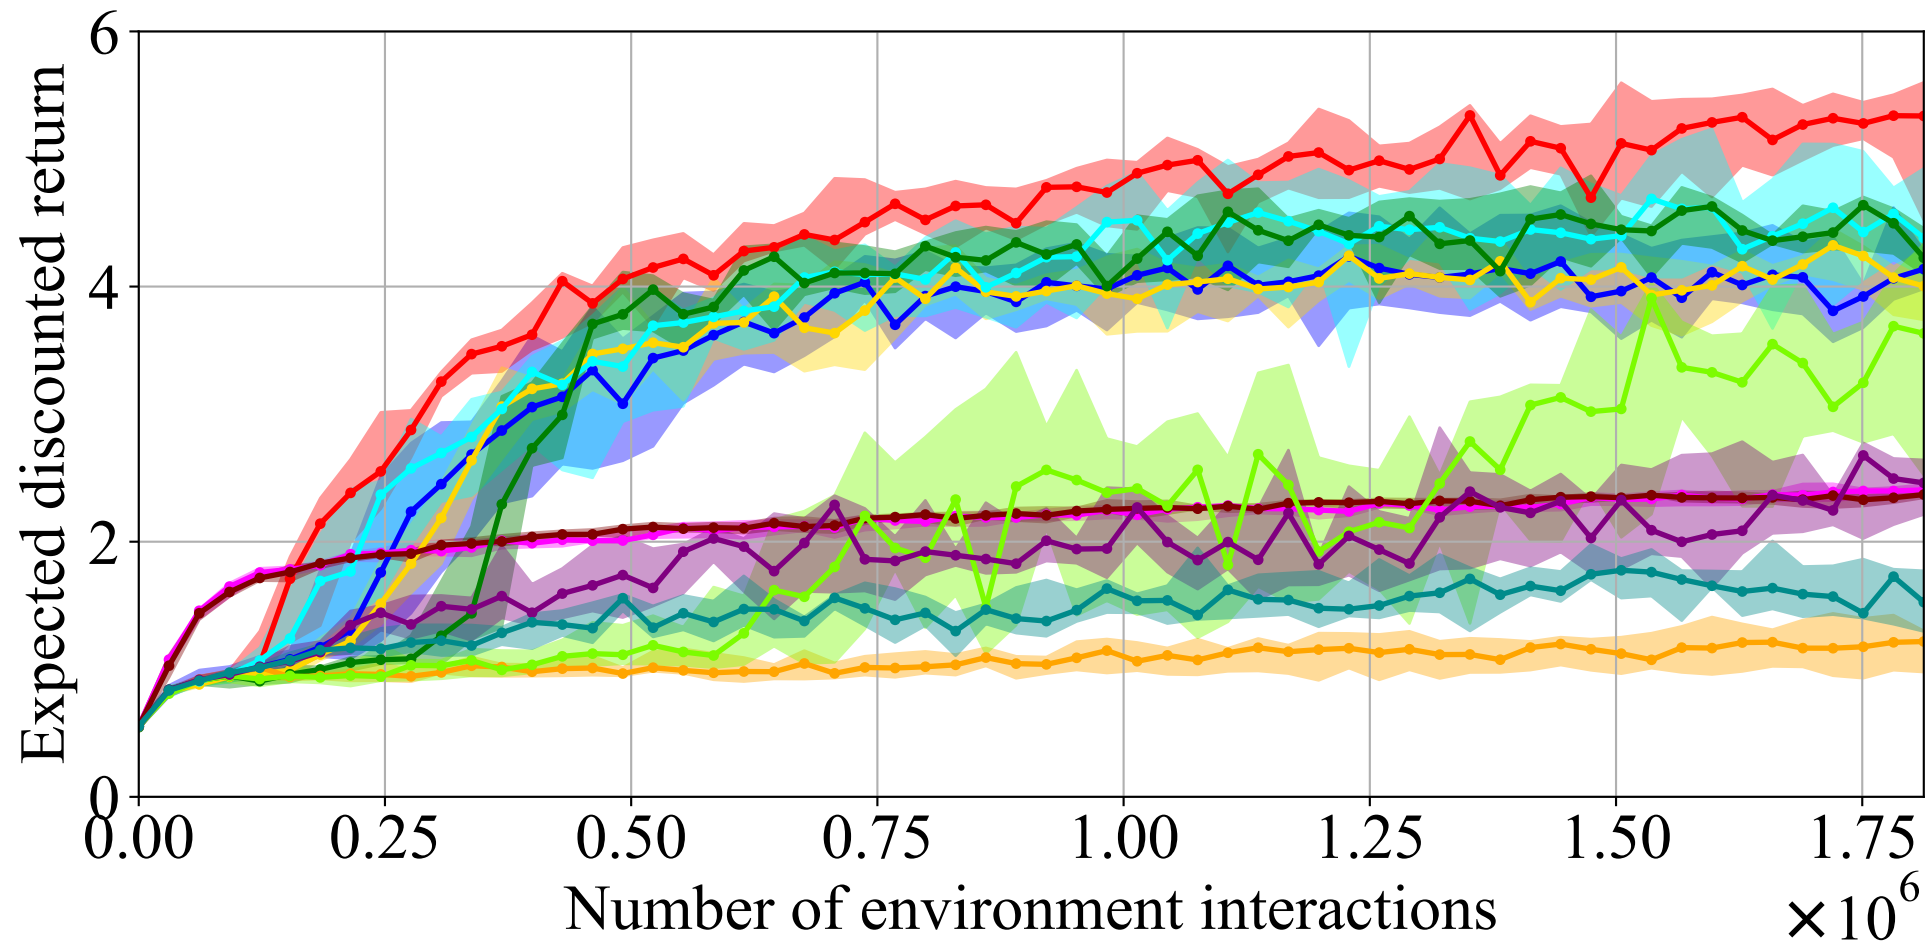

Supplement: supplementary_material [file attachment]

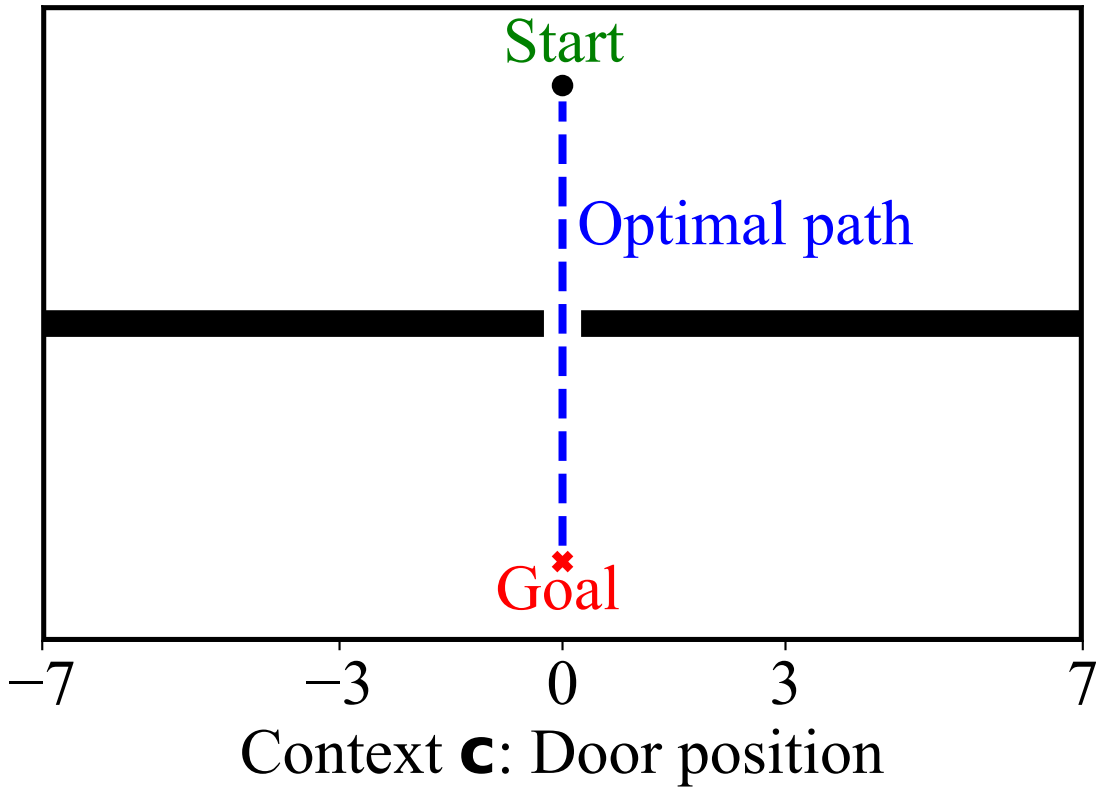

Supplement: supplementary_material [file attachment]

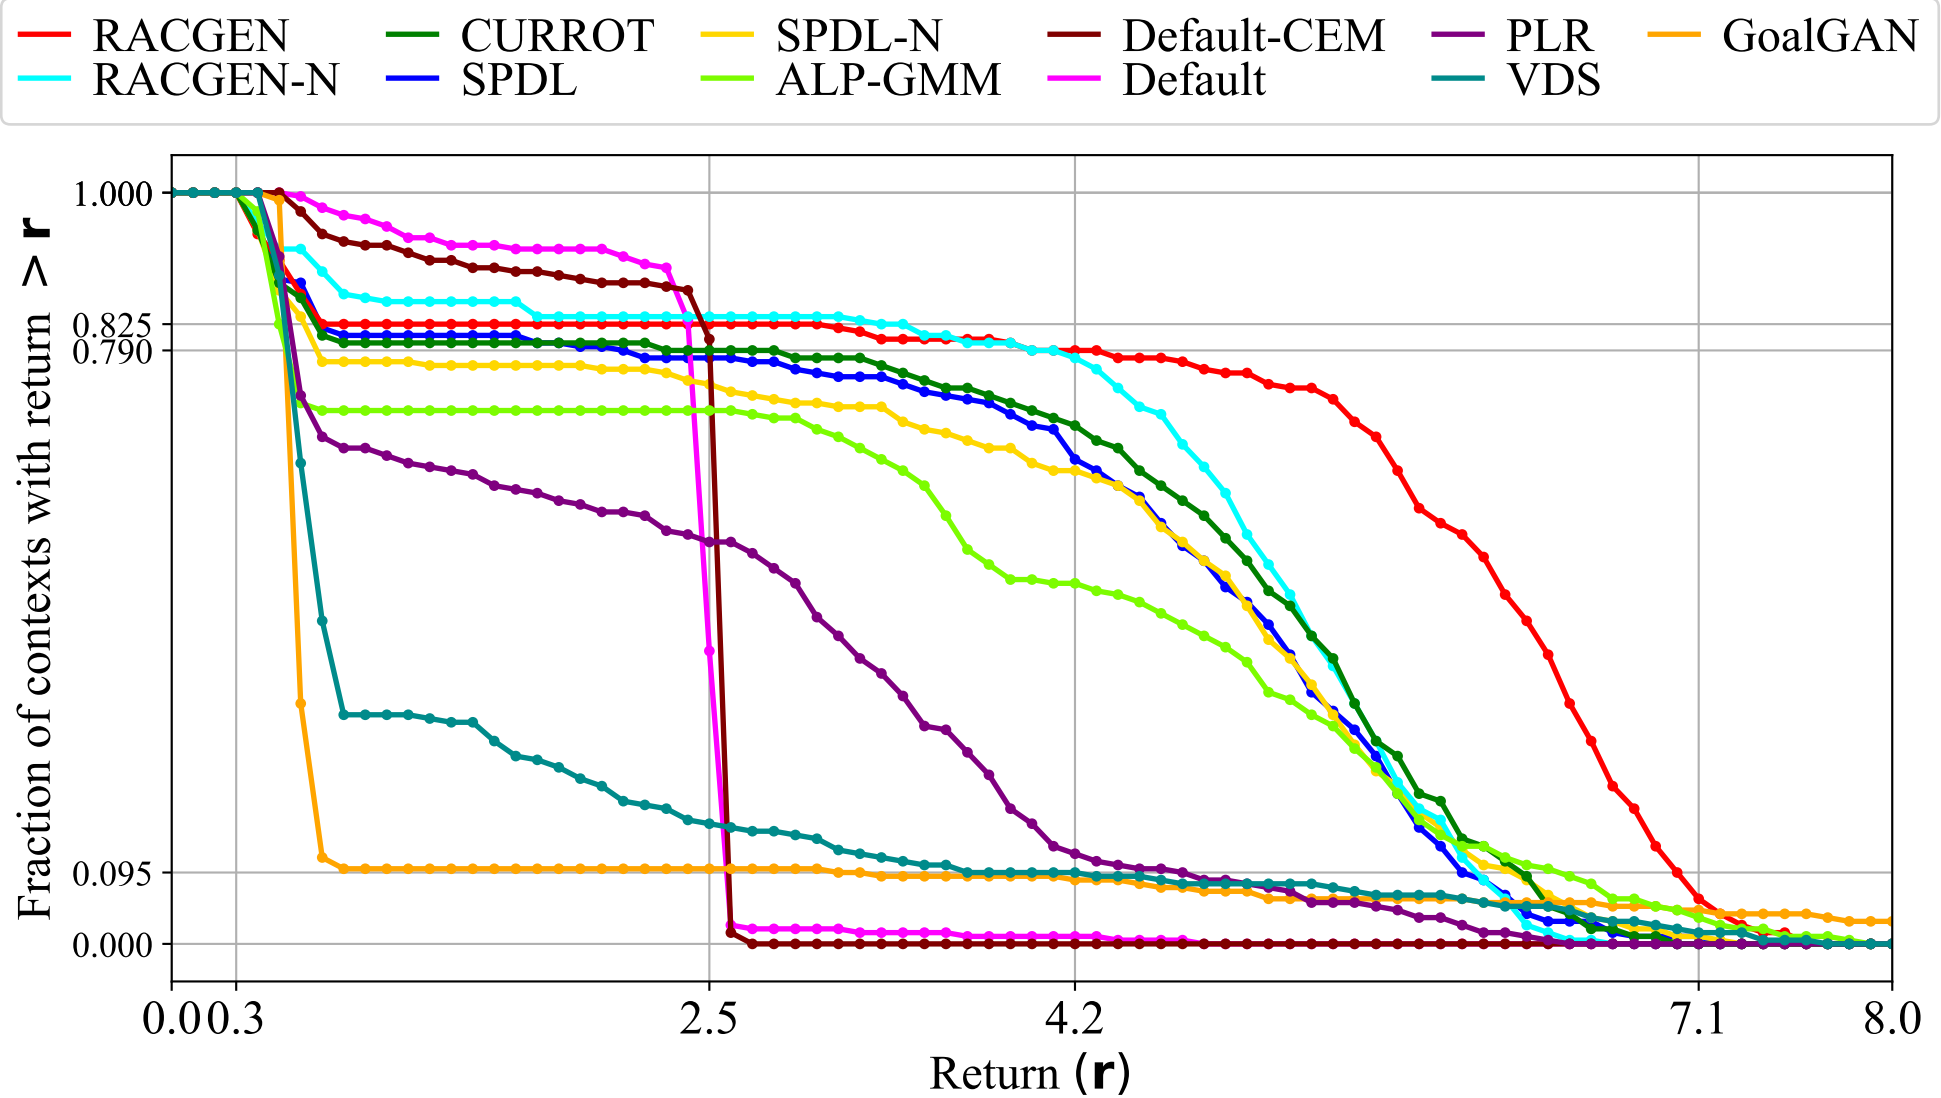

Supplement: supplementary_material [file attachment]

Discounted Return

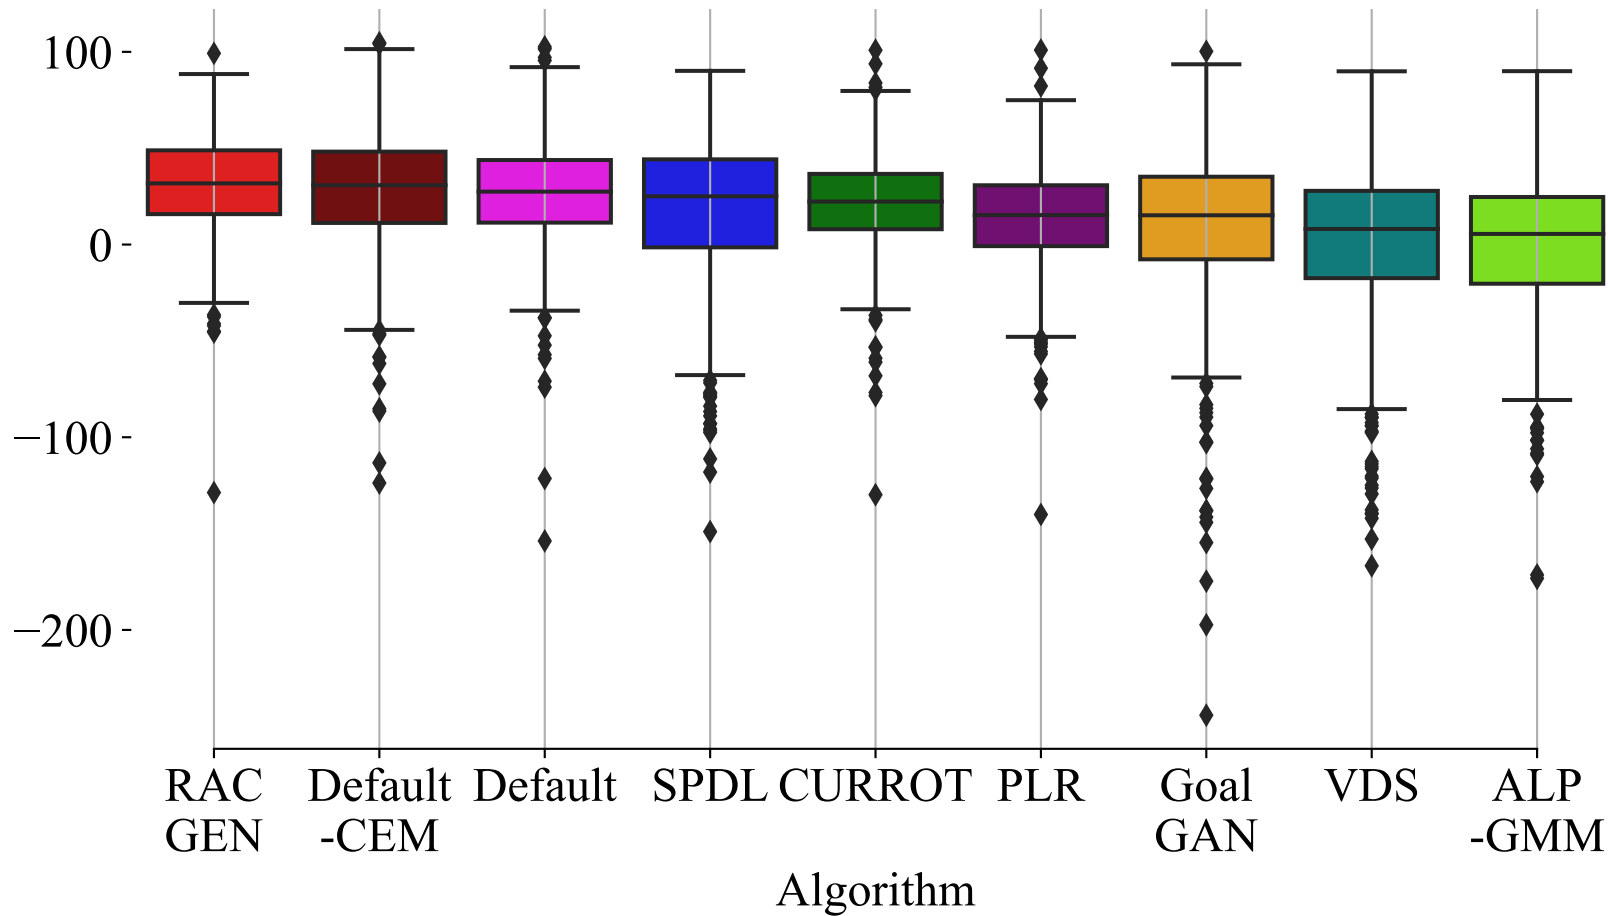

Supplement: supplementary_material [file attachment]

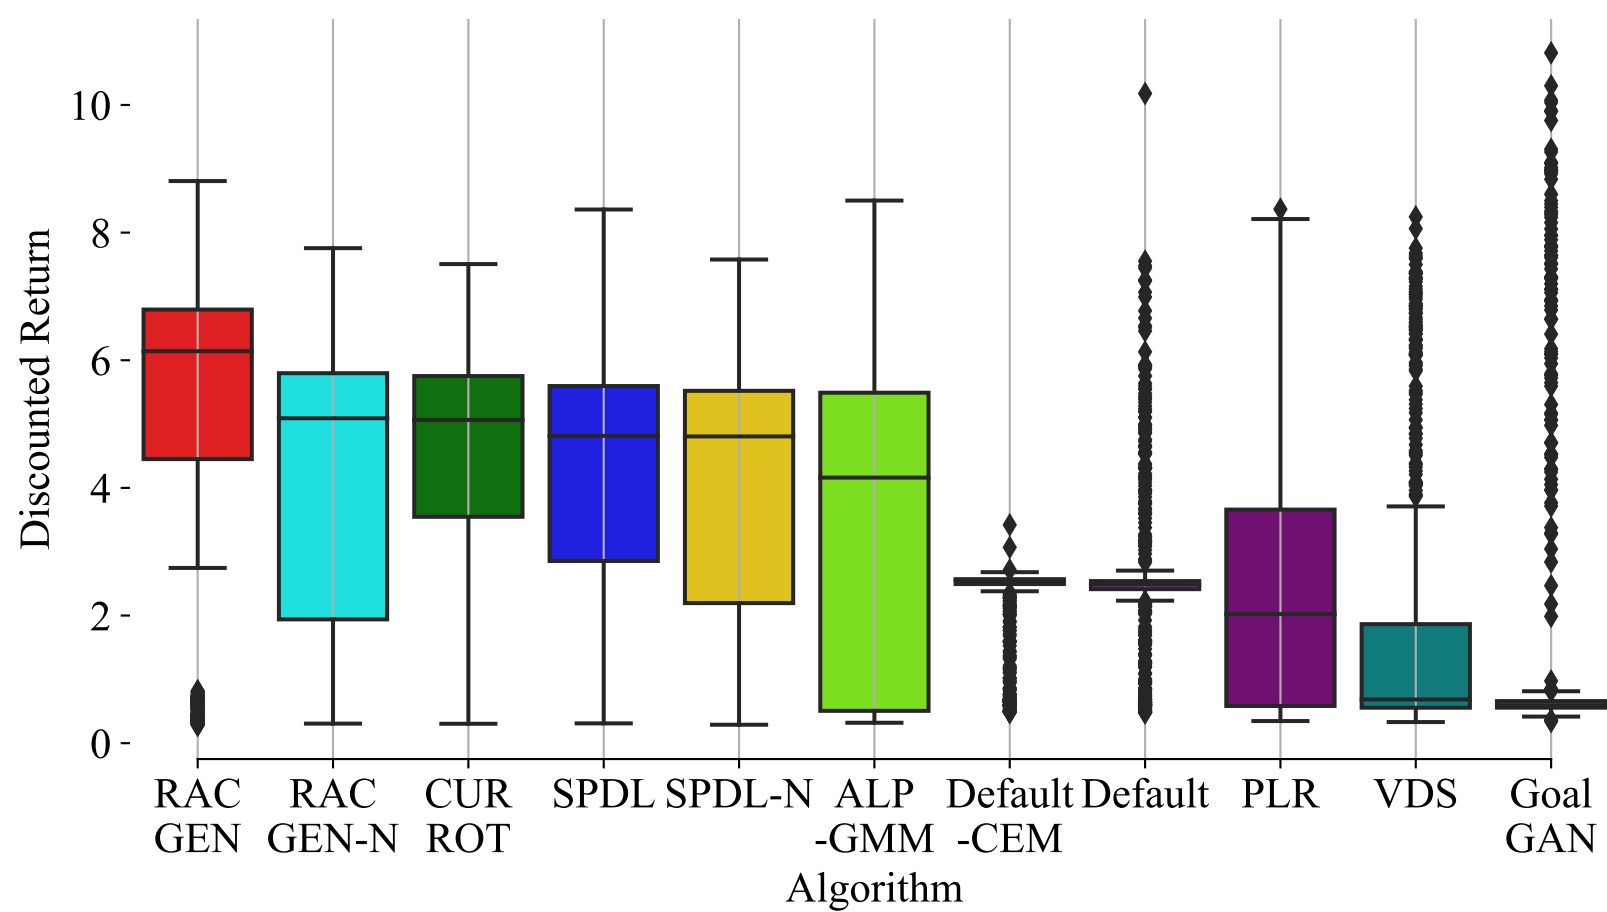

Supplement: supplementary_material [file attachment]

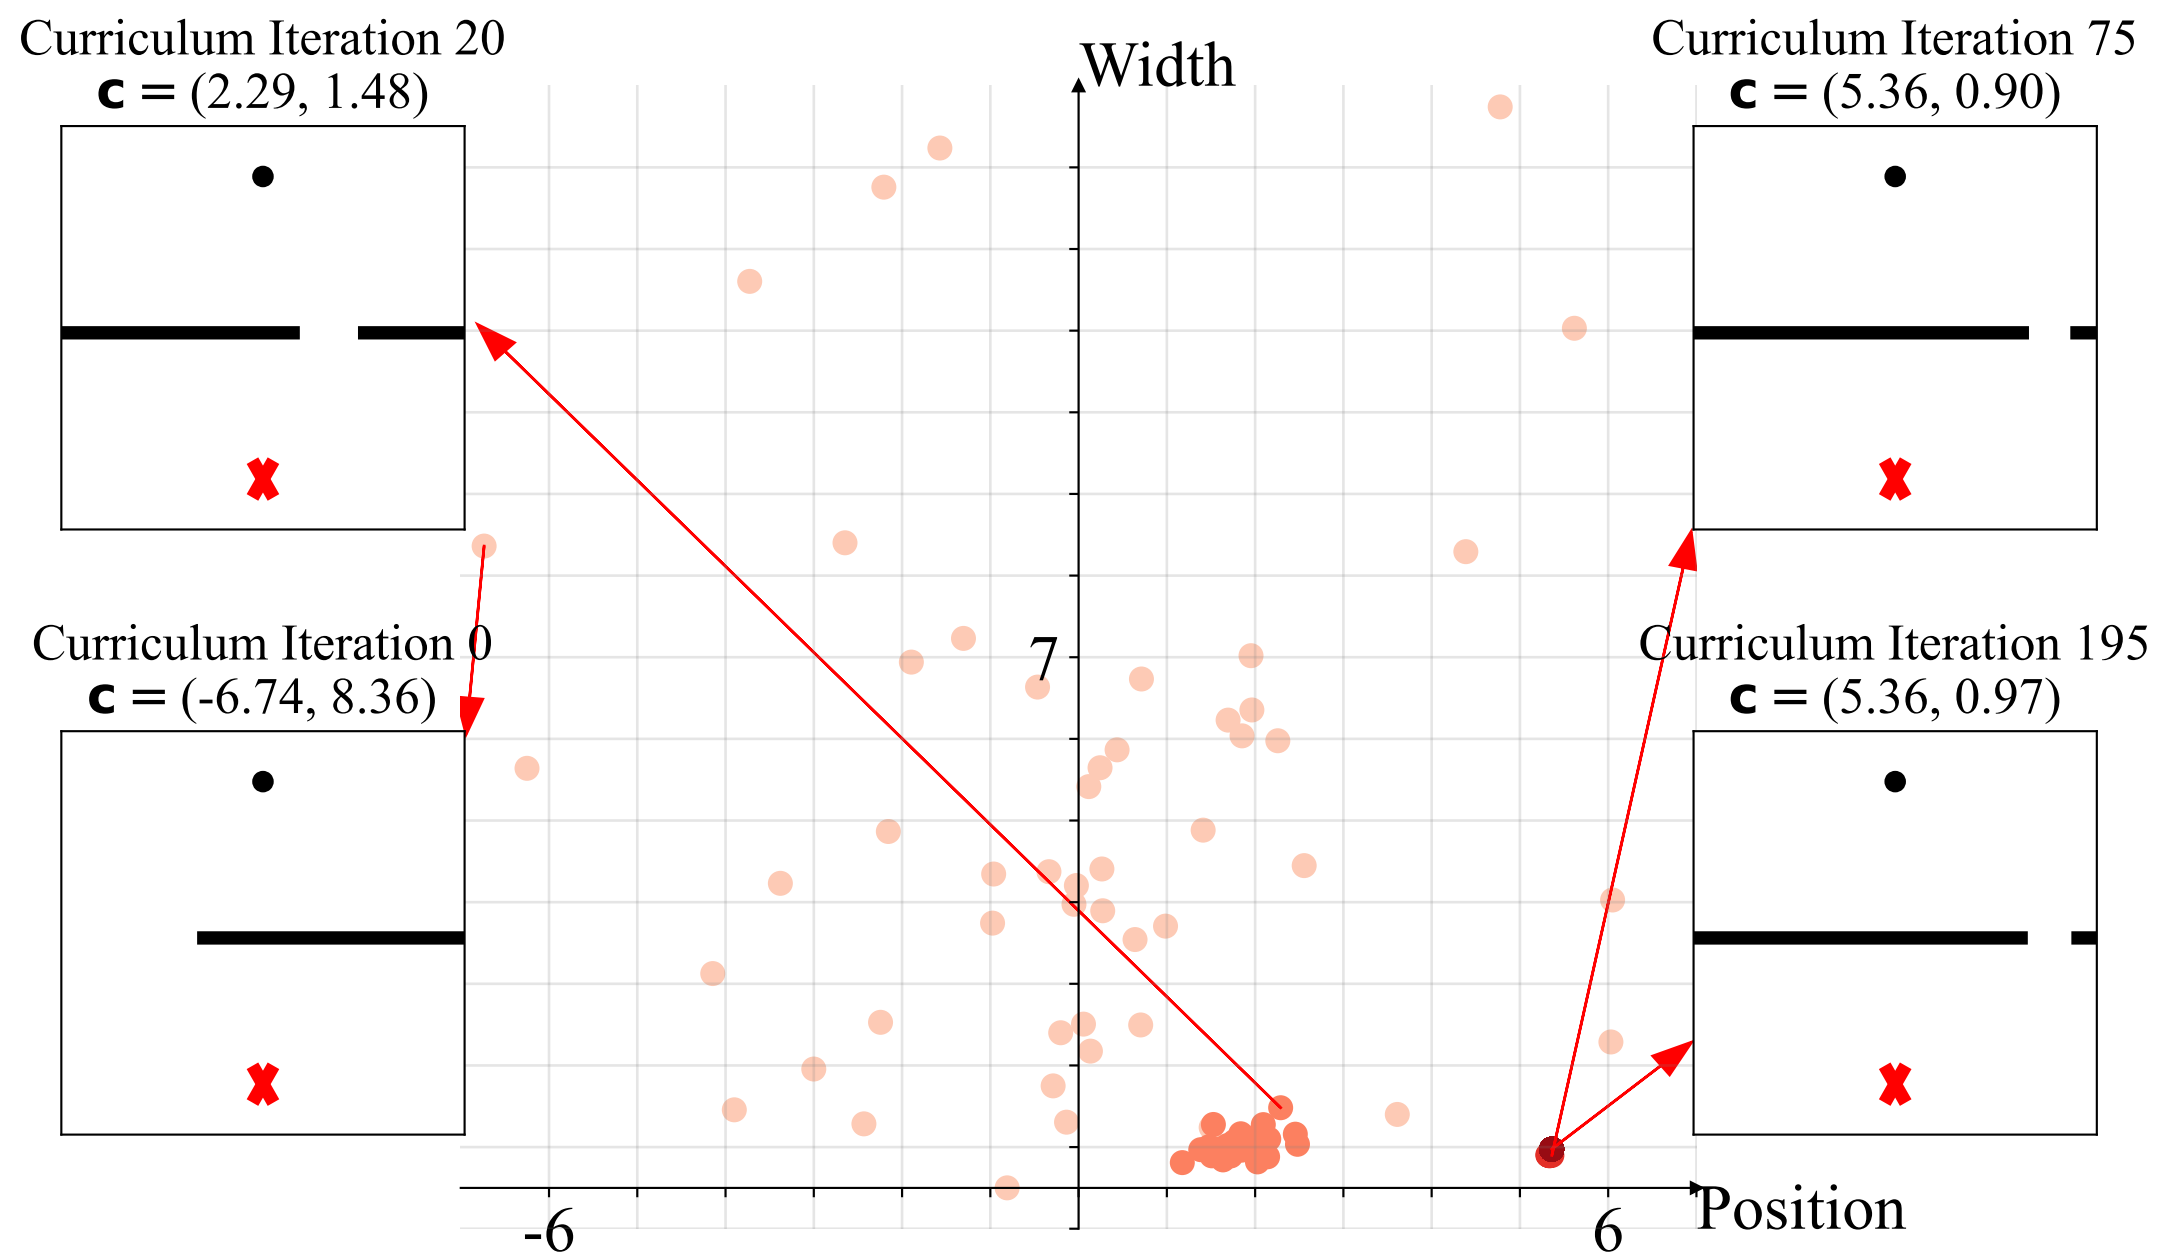

Supplement: supplementary_material [file attachment]
